# Supplementary material
Source: MDPI journal article supplement (https://www.mdpi.com/2073-4344/13/12/1491)
Supplement: s1 [file s1]

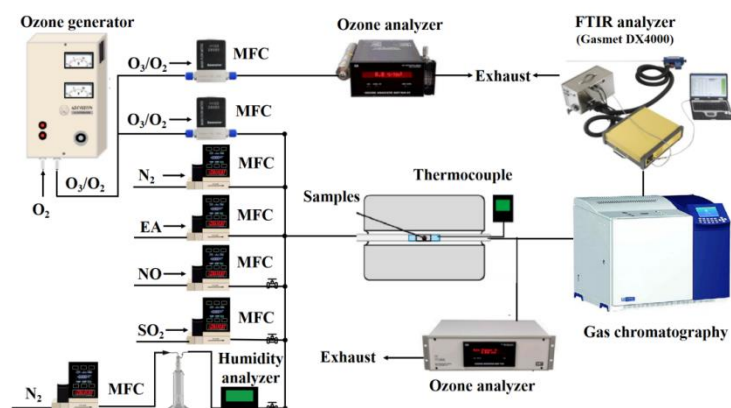

Figure S1. Schematic of experimental set-up.

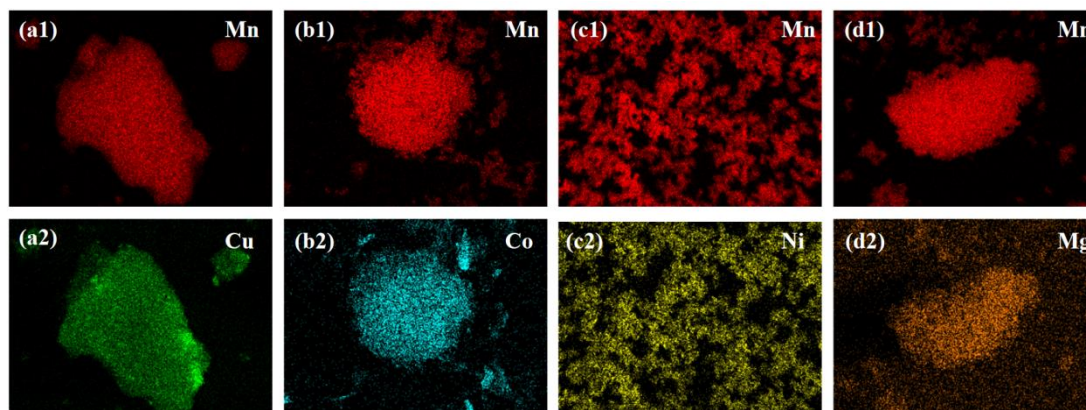

Figure S2. SEM images of (a1, a2): CuMn, (b1, b2): CoMn, (c1, c2): NiMn, and (d1, d2): MgMn.

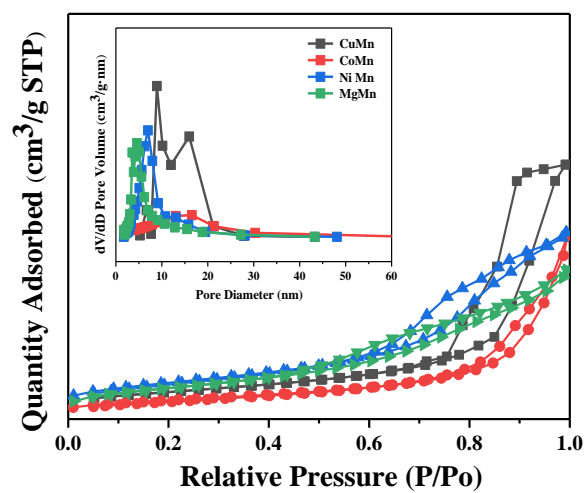

Figure S3.  $N_2$  adsorption-desorption isotherms and pore size distribution curves of synthesized catalysts.

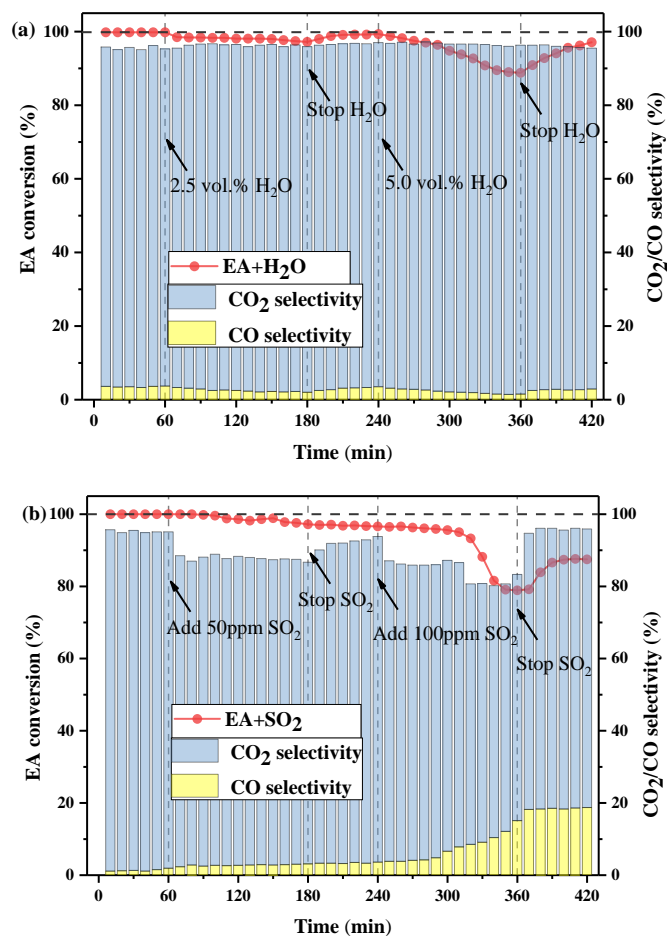

Figure S4. Effect of (a) H<sub>2</sub>O and (b) SO<sub>2</sub> on EA conversion efficiency and outlet CO<sub>x</sub> concentration over CuMn catalyst.

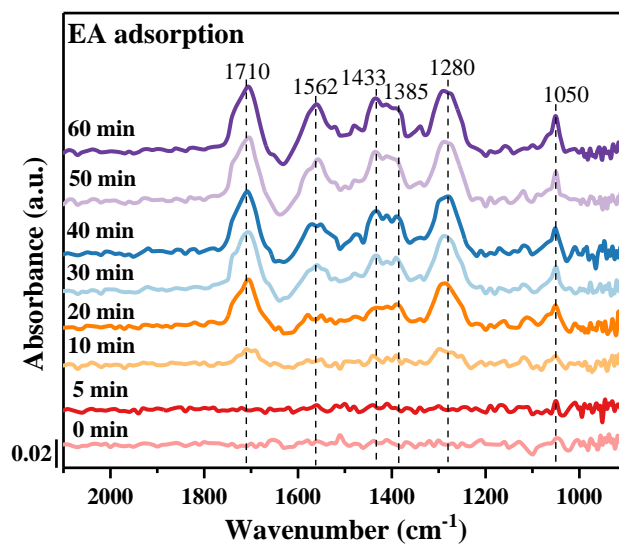

Figure S5. In-situ DRIFTS measurement over CuMn catalyst at 120 °C with 50 ppm EA.
